# Supplementary material for: Quantitative trait locus mapping of soybean maturity gene E5
Source: PubMed Central journal article supplement — Breed Sci. 2016 May 20;66(3):407–15. doi: 10.1270/jsbbs.15160 (PMC4902463; doi:10.1270/jsbbs.15160), 2016-05-20
Supplement: 66_15160_1.pdf [file 66_15160_1.pdf]

## Harosoy-*E5* x Clark-*e2*

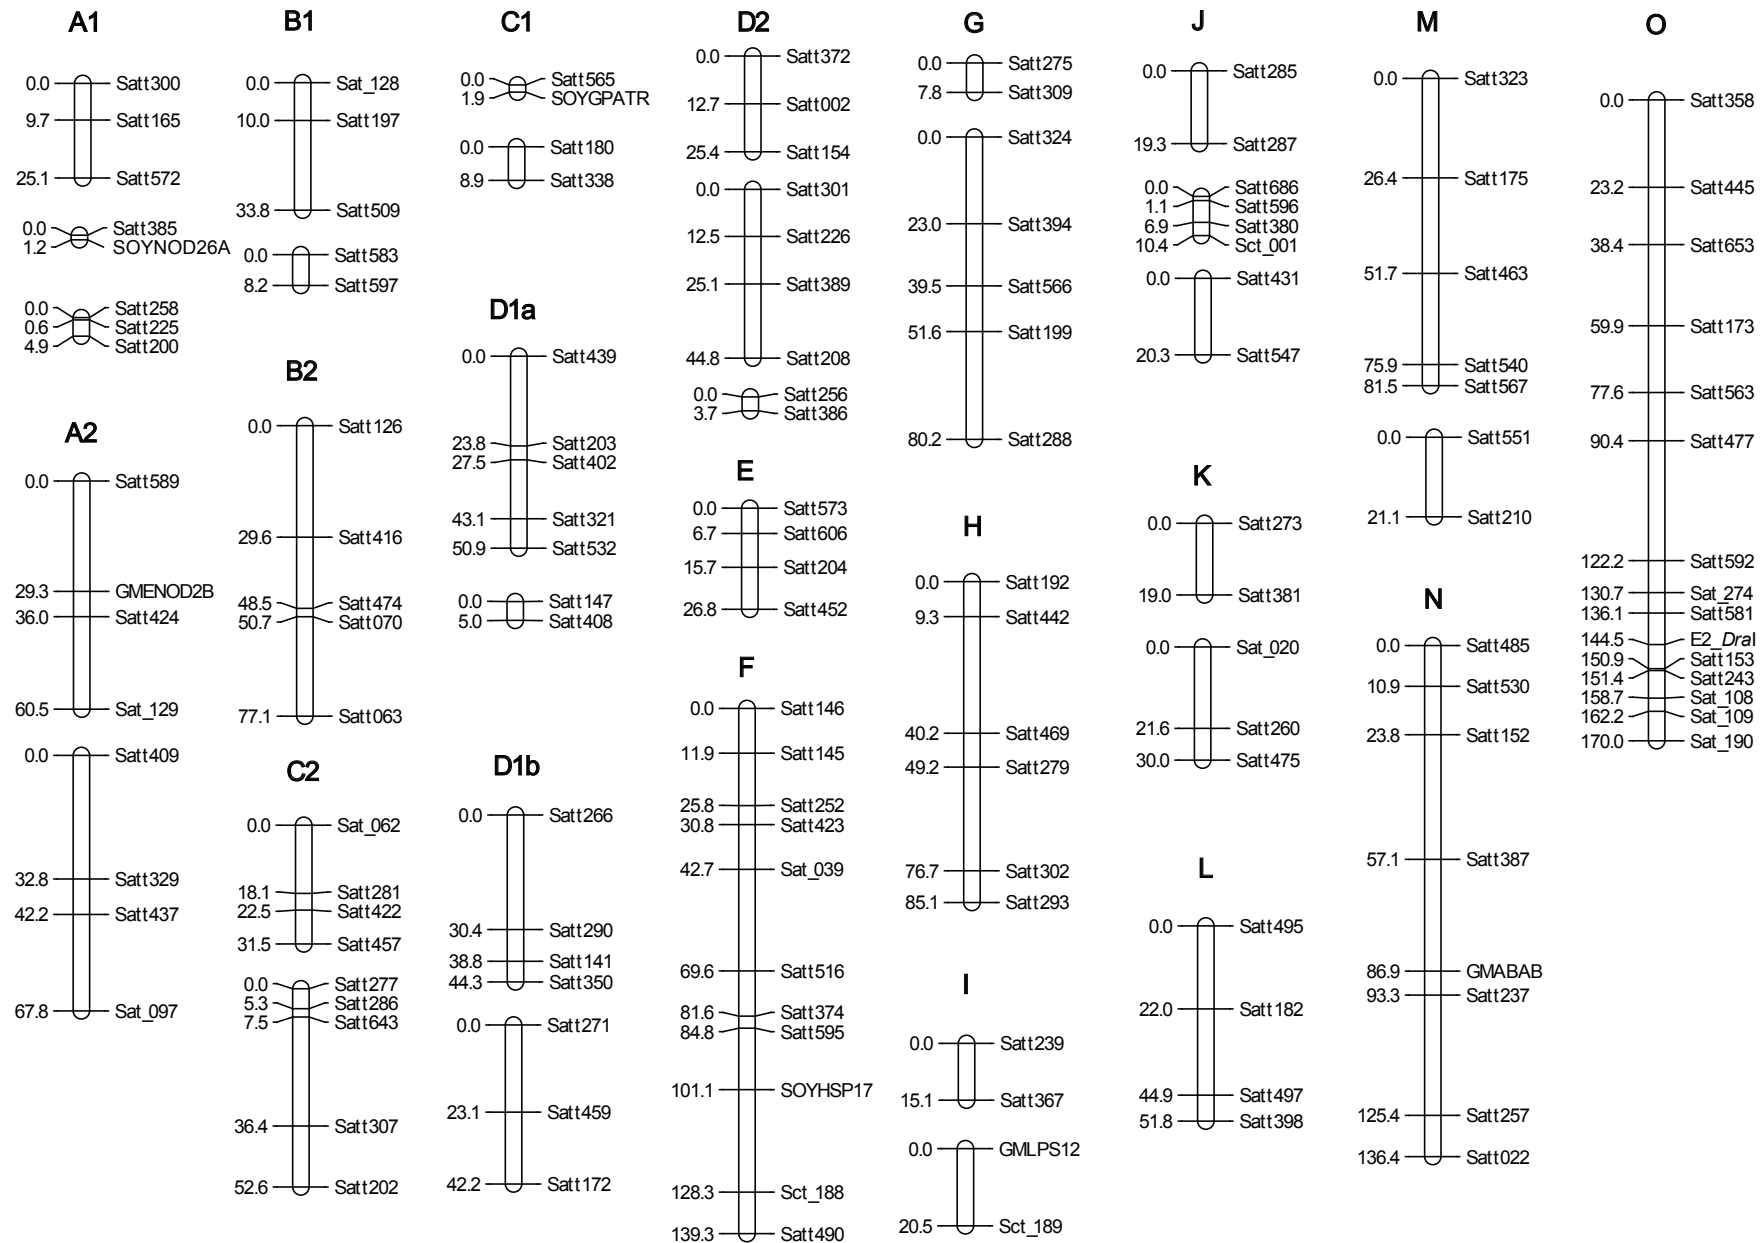

Supplemental Fig. 1. Linkage map of soybean F<sub>2</sub> populations. The name of the linkage group is indicated at the top. Distances of markers (cM) from the top of each linkage group are shown on the left.

# Harasoy x Clark-e2E5

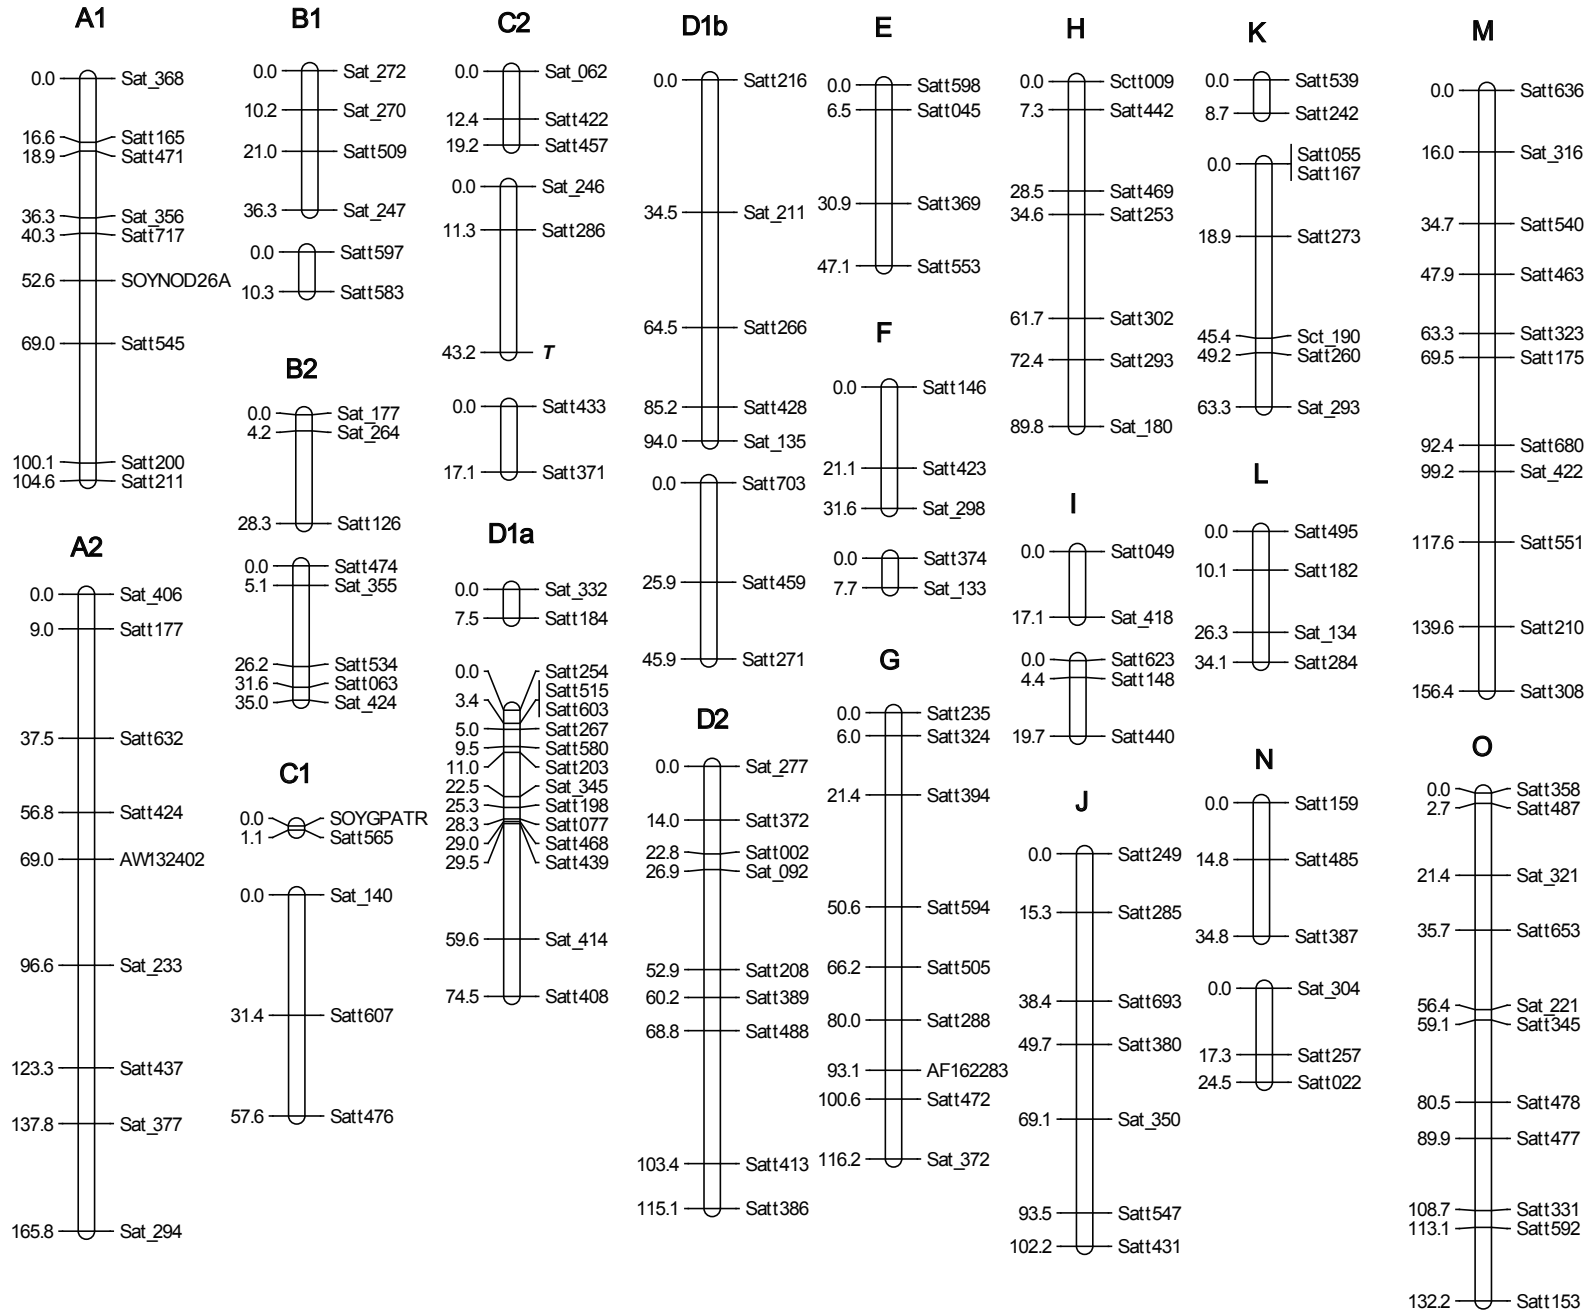

Supplemental Fig. 1. Continued.

# Harasoy-*E5Dt2* x Clark-*e2*

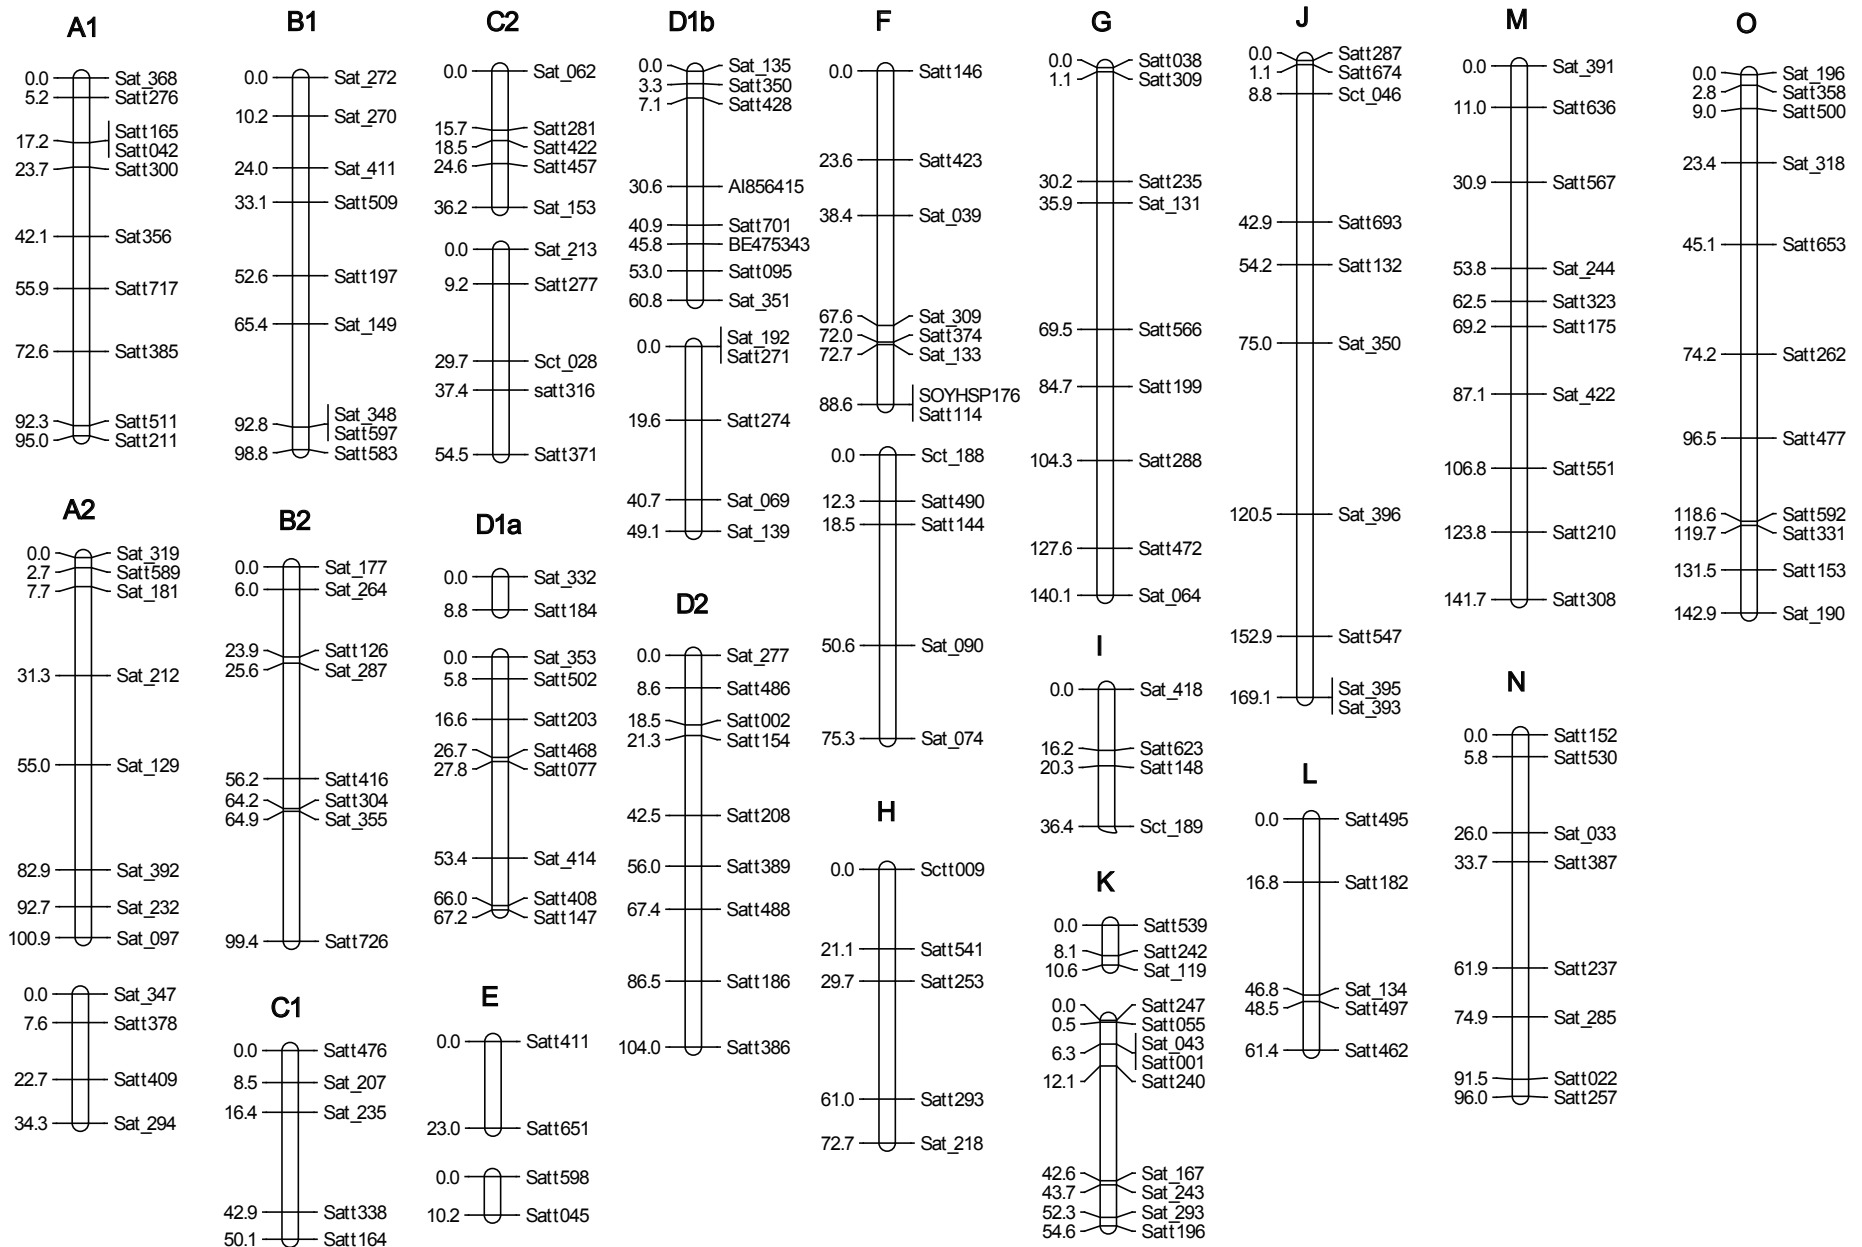

Supplemental Fig. 1. Continued.

# Harosoy x PI 80837

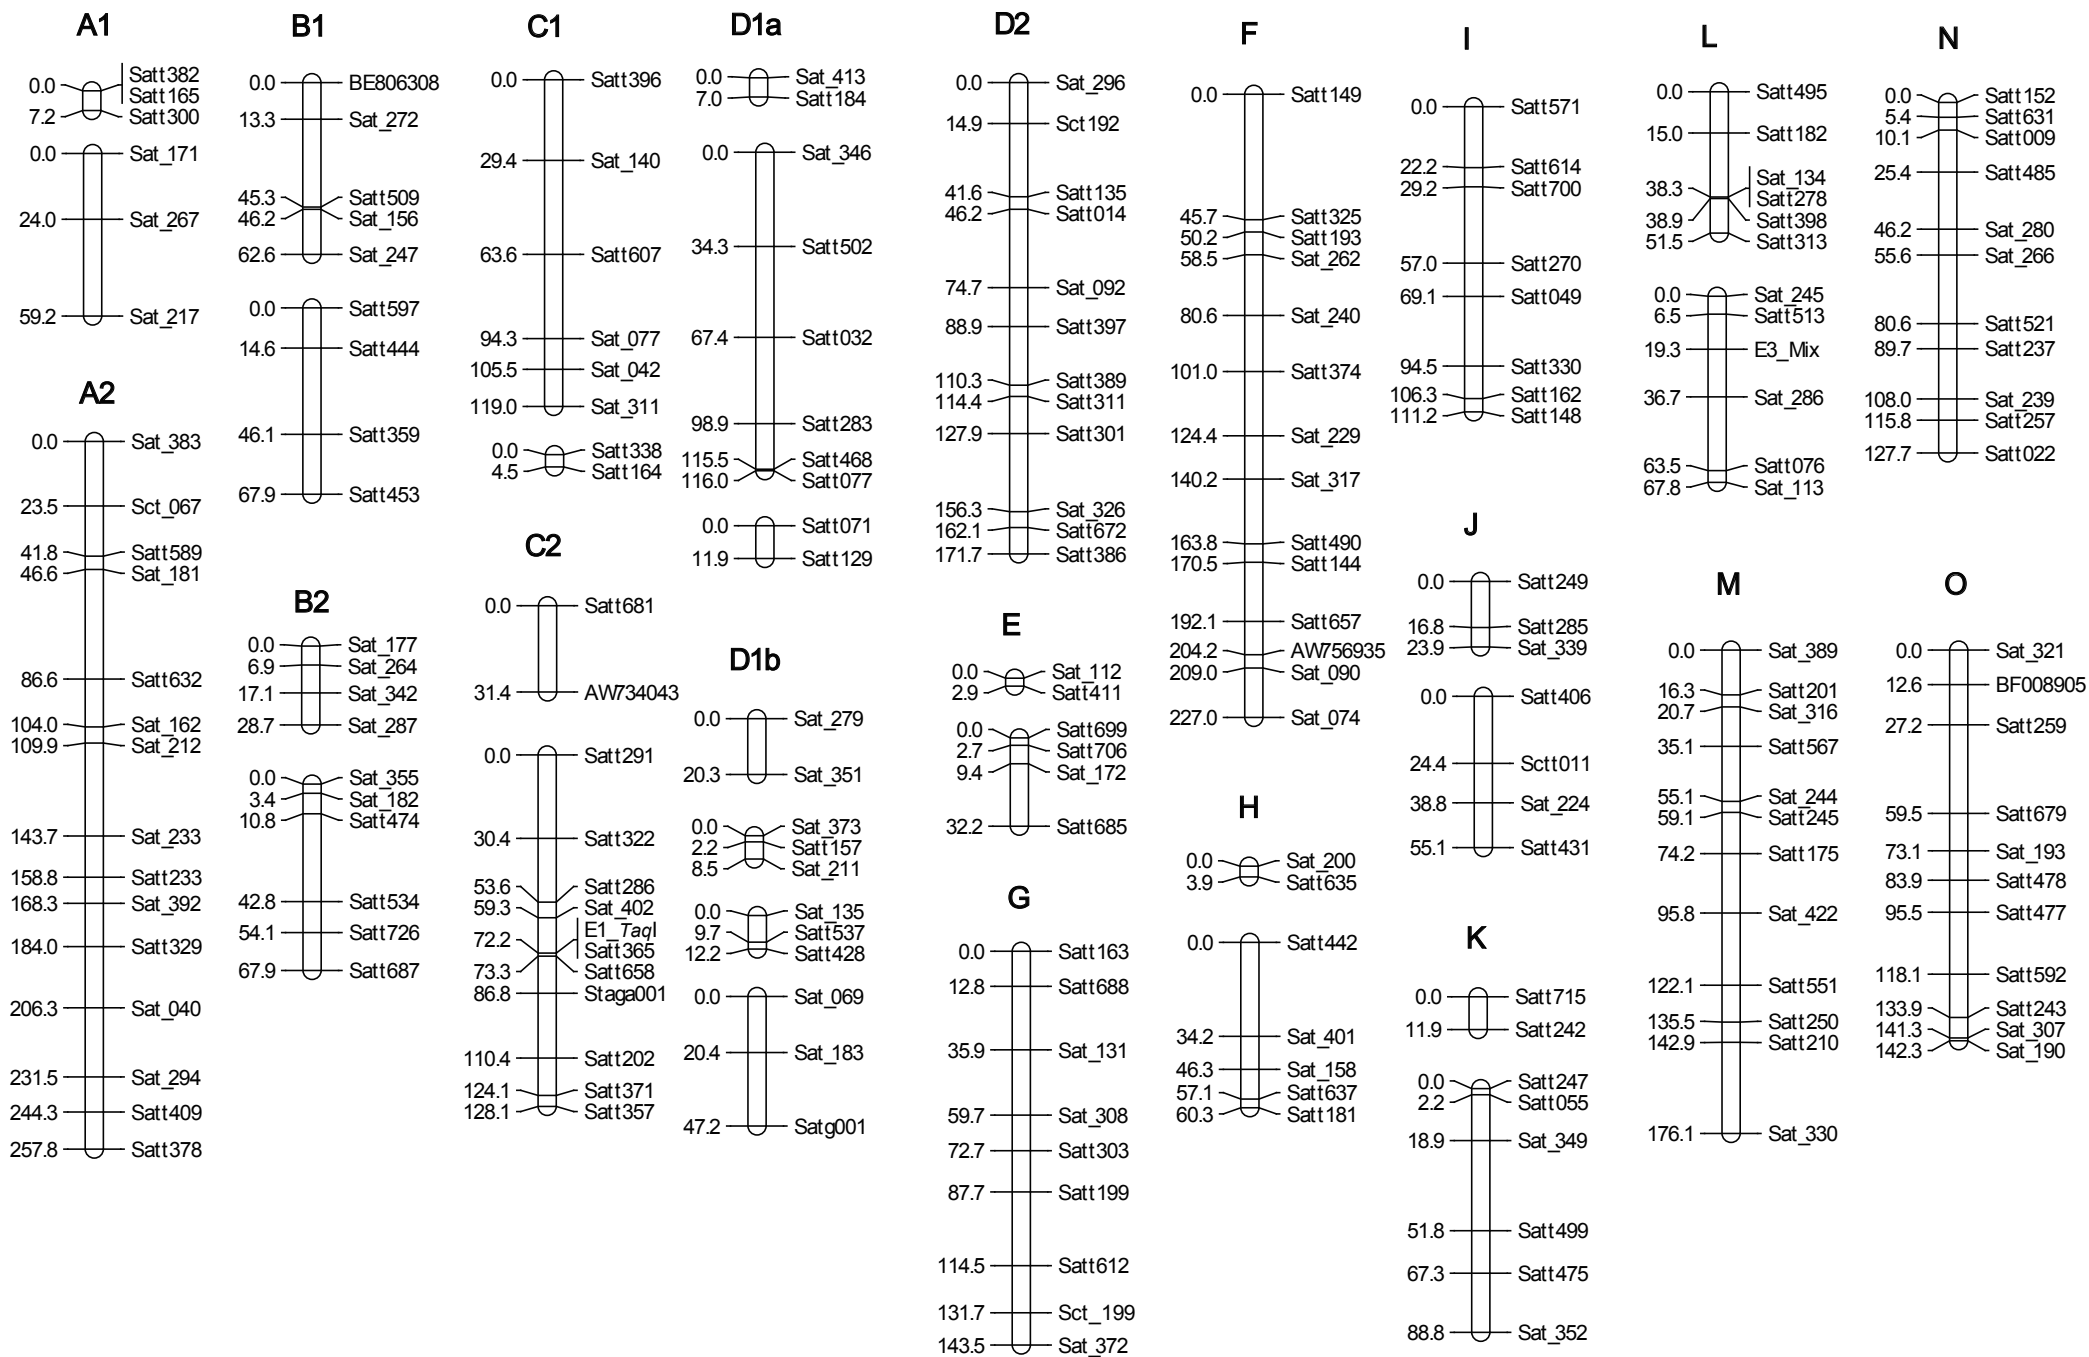

Supplemental Fig. 1. Continued.
