# Supplementary material for: Quantitative trait locus mapping of soybean maturity gene E5
Source: PubMed Central journal article supplement — Breed Sci. 2016 May 20;66(3):407–15. doi: 10.1270/jsbbs.15160 (PMC4902463; doi:10.1270/jsbbs.15160), 2016-05-20
Supplement: 66_15160_2.pdf [file 66_15160_2.pdf]

Supplemental Table 1. Genotype of SSR markers in Harosoy-E5

| Linkage group | Marker   | Genotype       | Linkage group | Marker  | Genotype       | Linkage group | Marker   | Genotype       |
|---------------|----------|----------------|---------------|---------|----------------|---------------|----------|----------------|
| A1            | Satt165  | Harosoy-type   | D2            | Satt135 | Harosoy-type   | L             | Satt495  | Harosoy-type   |
|               | Satt382  | Harosoy-type   |               | Satt372 | Harosoy-type   |               | Satt182  | Harosoy-type   |
|               | Satt300  | Harosoy-type   |               | Satt311 | Harosoy-type   |               | Satt278  | Harosoy-type   |
|               | Sat_171  | Harosoy-type   |               | Satt301 | Harosoy-type   |               | Satt076  | Harosoy-type   |
|               | Sat_267  | Harosoy-type   |               | Satt386 | Harosoy-type   |               | Sat_245  | Harosoy-type   |
| A2            | Sat_383  | Harosoy-type   | E             | Sat_112 | Harosoy-type   | M             | Sat_389  | Harosoy-type   |
|               | Sat_212  | Harosoy-type   |               | Satt651 | Harosoy-type   |               | Satt245  | Harosoy-type   |
|               | Sat_233  | Harosoy-type   |               | Satt699 | Harosoy-type   |               | Satt175  | Harosoy-type   |
|               | Satt329  | Harosoy-type   |               | Satt706 | Harosoy-type   |               | Sat_422  | Harosoy-type   |
|               | Sat_294  | Harosoy-type   |               | Satt685 | Harosoy-type   |               | Sat_330  | Harosoy-type   |
| B1            | Sat_272  | Harosoy-type   | F             | Satt193 | Harosoy-type   | N             | Satt009  | Harosoy-type   |
|               | Satt509  | Harosoy-type   |               | Satt149 | Harosoy-type   |               | Sat_280  | Harosoy-type   |
|               | Sat_247  | Harosoy-type   |               | Satt374 | Harosoy-type   |               | Satt521  | Harosoy-type   |
|               | Satt597  | Harosoy-type   |               | Satt490 | Harosoy-type   |               | Satt257  | Harosoy-type   |
|               | Satt359  | Harosoy-type   |               | Sat_074 | Harosoy-type   |               | Satt022  | Harosoy-type   |
| B2            | Sat_264  | Harosoy-type   | G             | Satt163 | Harosoy-type   | O             | BF008905 | Harosoy-type   |
|               | Sat_182  | Harosoy-type   |               | Satt688 | Harosoy-type   |               | Satt679  | Harosoy-type   |
|               | Satt474  | Harosoy-type   |               | Sat_131 | Harosoy-type   |               | Sat_193  | Harosoy-type   |
|               | Satt726  | Harosoy-type   |               | Sct_199 | Harosoy-type   |               | Satt477  | Harosoy-type   |
|               | Satt687  | Harosoy-type   |               | Sat_372 | Harosoy-type   |               | Satt592  | different type |
| C1            | Satt396  | Harosoy-type   | H             | Sat_200 | Harosoy-type   |               |          |                |
|               | Sat_140  | Harosoy-type   |               | Satt442 | Harosoy-type   |               |          |                |
|               | Satt338  | Harosoy-type   |               | Satt637 | Harosoy-type   |               |          |                |
|               | Sat_311  | Harosoy-type   |               | Satt181 | Harosoy-type   |               |          |                |
|               | Satt164  | Harosoy-type   |               | Sat_401 | Harosoy-type   |               |          |                |
| C2            | AW734043 | Harosoy-type   | I             | Satt571 | Harosoy-type   |               |          |                |
|               | Satt291  | Harosoy-type   |               | Satt700 | Harosoy-type   |               |          |                |
|               | Satt643  | Harosoy-type   |               | Satt049 | different type |               |          |                |
|               | Sat_312  | Harosoy-type   |               | Satt162 | Harosoy-type   |               |          |                |
|               | Satt371  | Harosoy-type   |               | Satt148 | PI 80837-type  |               |          |                |
| D1a           | Satt184  | Harosoy-type   | J             | Satt249 | Harosoy-type   |               |          |                |
|               | Satt179  | Harosoy-type   |               | Satt285 | Harosoy-type   |               |          |                |
|               | Satt283  | Harosoy-type   |               | Satt406 | different type |               |          |                |
|               | Satt077  | Harosoy-type   |               | Satt621 | Harosoy-type   |               |          |                |
|               | Satt071  | Harosoy-type   |               | Satt431 | Harosoy-type   |               |          |                |
| D1b           | Sat_279  | Harosoy-type   | K             | Satt715 | Harosoy-type   |               |          |                |
|               | Sat_135  | Harosoy-type   |               | Satt055 | Harosoy-type   |               |          |                |
|               | Satt537  | Harosoy-type   |               | Satt247 | Harosoy-type   |               |          |                |
|               | Sat_183  | different type |               | Satt499 | Harosoy-type   |               |          |                |
|               | Satg001  | Harosoy-type   |               | Sat_352 | Harosoy-type   |               |          |                |
